# Supplementary material for: A novel RNA binding protein affects rbcL gene expression and is specific to bundle sheath chloroplasts in C4 plants
Source: PubMed Central journal article supplement (PMC3849040; doi:10.1186/1471-2229-13-138), 2013-09-22

## Additional File 2: Figure S2

### Results colour-coded for amino acid conservation

The current colourscheme of the alignment is for **amino acid conservation**.

The conservation scoring is performed by PRALINE. The scoring scheme works from 0 for the least conserved alignment position, up to 10 for the most conserved. The colour assignments are:

Unconserved 0 1 2 3 4 5 6 7 8 9 10 Conserved

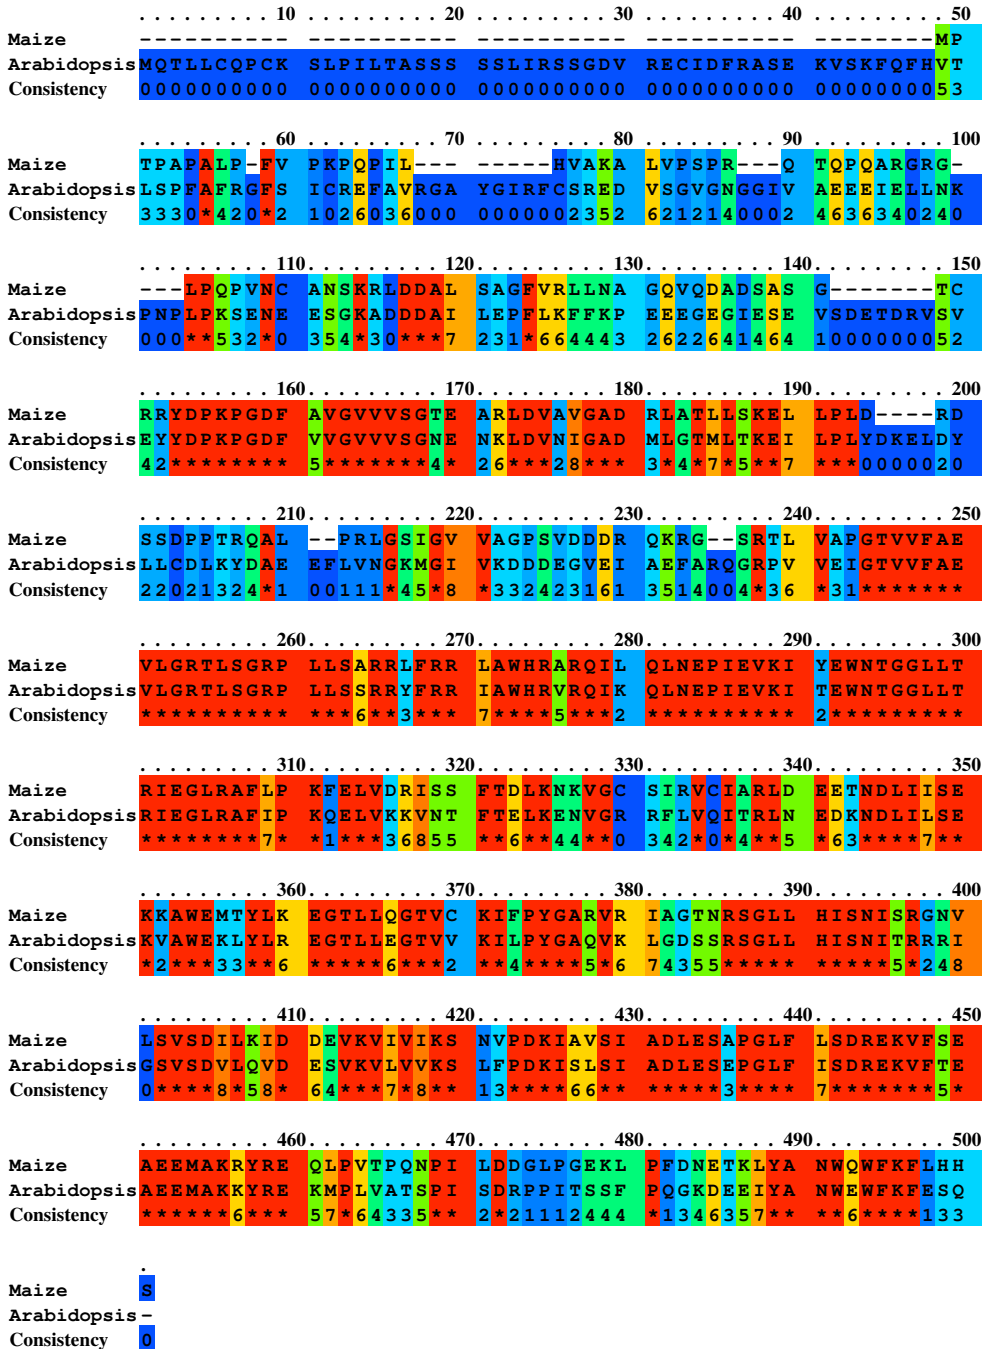

Supplement: 1471-2229-13-138-S2.pdf [file 1471-2229-13-138-S2.pdf]
