# Supplementary material for: A novel RNA binding protein affects rbcL gene expression and is specific to bundle sheath chloroplasts in C4 plants
Source: PubMed Central journal article supplement (PMC3849040; doi:10.1186/1471-2229-13-138), 2013-09-22

**Additional File 8: Figure S8**

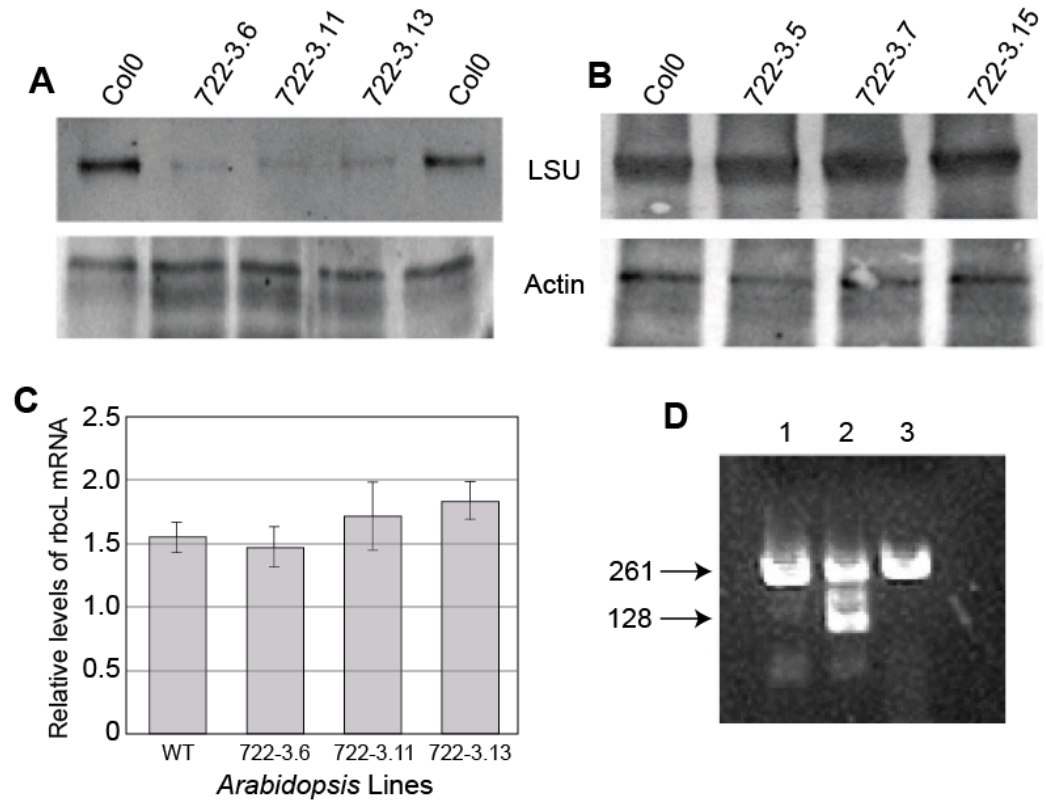

Supplement: 1471-2229-13-138-S8.pdf [file 1471-2229-13-138-S8.pdf]
